# Supplementary material for: Mitochondrial sAC-cAMP-PKA Axis Modulates the ΔΨm-Dependent Control Coefficients of the Respiratory Chain Complexes: Evidence of Respirasome Plasticity
Source: MDPI journal article supplement (doi:10.3390/ijms242015144), 2023-10-13
Supplement: s1 [file s1]

# Supplemental Fig. S1

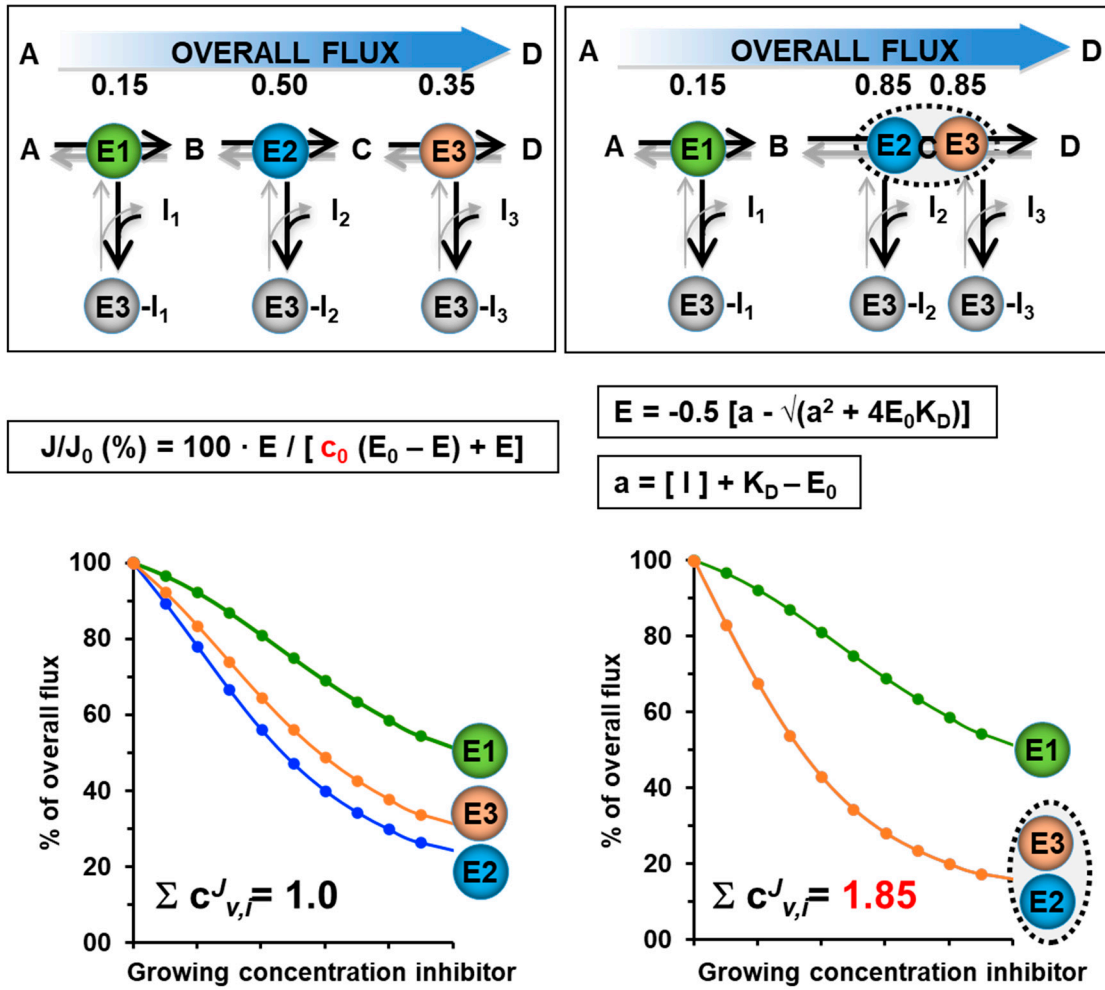

**Figure S1. Schematic representation of the distribution of the control coefficients in a multi-enzymatic metabolic pathway.** An overall flux from an initial compound A to the final compound D is shown as resulting from the linear sequence of the three enzymatic steps E1, E2, E3 each specifically inhibitable by I<sub>1</sub>, I<sub>2</sub> and I<sub>3</sub> respectively. The assumed control coefficient for each of the individual steps is given as figures on the top of them. The graphs show a simulation of the inhibitory titration curve for each of the three enzymatic steps as percentage of the uninhibited flux at increasing concentrations of the specific inhibitor. The equation used is indicated and it is from [Gellerich FN 1990 ref. 25 in the main text] as modified in [Quarato G 2011 ref. 18 in the main text]. Similar arbitrary values for E<sub>0</sub> (total concentration of the enzyme) and for K<sub>D</sub> (dissociation constant of the E-I complex) were used for the three enzymes whereas different values of c<sub>0</sub>, as indicated, were imputed in the equation. Two conditions are set: the left part assumes that the three enzymes are functionally independent; the right part assumes that two of the three steps are complexed (E2-E3). The sum of the control coefficients is shown in the graphs for the two conditions. See the main text and further references therein regarding the “metabolic flux theory”.
